# Supplementary material for: Pleiotropic Effects of a Mitochondrial–Nuclear Incompatibility Depend upon the Accelerating Effect of Temperature inDrosophila
Source: Oxford University Press journal article supplement (doi:10.1534/genetics.113.154914), 2013-09-12
Supplement: genetics.113.154914-1.pdf [file genetics.113.154914-1.pdf]

**Table S3. Temperature dependence of the mitochondrial-nuclear interaction effect on pupation height**

| Phenotype                                   | Factor <sup>1</sup> | numDF | denDf | F-value | P-value |
|---------------------------------------------|---------------------|-------|-------|---------|---------|
| 16°C Pupation height<br>(N=1271, 40 vials)  | mtDNA               | 1     | 36    | 0.28    | 0.5991  |
|                                             | Nuclear             | 1     | 36    | 23.78   | <0.0001 |
|                                             | mtDNA x Nuclear     | 1     | 36    | 3.57    | 0.0668  |
| 22°C Pupation height<br>(N= 1745, 40 vials) | mtDNA               | 1     | 36    | 13.56   | 0.0008  |
|                                             | Nuclear             | 1     | 36    | 6.21    | 0.0175  |
|                                             | mtDNA x Nuclear     | 1     | 36    | 8.39    | 0.0064  |
| 25°C Pupation height<br>(N= 1588, 40 vials) | mtDNA               | 1     | 36    | 13.46   | 0.0008  |
|                                             | Nuclear             | 1     | 36    | 56.60   | <0.0001 |
|                                             | mtDNA x Nuclear     | 1     | 36    | 19.14   | 0.0001  |

<sup>1</sup> Mixed-model ANOVA fit using restricted maximum likelihood and including vial as a random factor
