# Supplementary material for: Pleiotropic Effects of a Mitochondrial–Nuclear Incompatibility Depend upon the Accelerating Effect of Temperature inDrosophila
Source: Oxford University Press journal article supplement (doi:10.1534/genetics.113.154914), 2013-09-12
Supplement: genetics.113.154914-4.pdf [file genetics.113.154914-4.pdf]

**Table S6. Temperature dependence of the mitochondrial-nuclear interaction effect on metabolic plasticity**

| Phenotype                                                 | Factor                                            | numDF | denDf | F-value | P-value |
|-----------------------------------------------------------|---------------------------------------------------|-------|-------|---------|---------|
| Mass-corrected larval<br>metabolic rate<br>(N=322)        | T <sub>DEV</sub>                                  | 1     | 306   | 9.219   | 0.0026  |
|                                                           | T <sub>MEASURE</sub>                              | 1     | 306   | 651.8   | <0.0001 |
|                                                           | mtDNA                                             | 1     | 306   | 0.557   | 0.4560  |
|                                                           | Nuclear                                           | 1     | 306   | 17.19   | <0.0001 |
|                                                           | T <sub>DEV</sub> × T <sub>MEASURE</sub>           | 1     | 306   | 40.44   | <0.0001 |
|                                                           | T <sub>DEV</sub> × mtDNA                          | 1     | 306   | 8.945   | 0.0030  |
|                                                           | T <sub>MEASURE</sub> × mtDNA                      | 1     | 306   | 2.755   | 0.0980  |
|                                                           | T <sub>DEV</sub> × Nuclear                        | 1     | 306   | 12.93   | 0.0004  |
|                                                           | T <sub>MEASURE</sub> × Nuclear                    | 1     | 306   | 16.90   | 0.0001  |
|                                                           | mtDNA × Nuclear                                   | 1     | 306   | 2.277   | 0.1323  |
|                                                           | T <sub>DEV</sub> × T <sub>MEASURE</sub> × mtDNA   | 1     | 306   | 0.917   | 0.3390  |
|                                                           | T <sub>DEV</sub> × T <sub>MEASURE</sub> × Nuclear | 1     | 306   | 0.692   | 0.4061  |
|                                                           | T <sub>DEV</sub> × mtDNA × Nuclear                | 1     | 306   | 13.074  | 0.0004  |
|                                                           | T <sub>MEASURE</sub> × mtDNA × Nuclear            | 1     | 306   | 0.018   | 0.8920  |
| T <sub>DEV</sub> × T <sub>MEASURE</sub> × mtDNA × Nuclear | 1                                                 | 306   | 4.939 | 0.0270  |         |
