# Supplementary material for: Pleiotropic Effects of a Mitochondrial–Nuclear Incompatibility Depend upon the Accelerating Effect of Temperature inDrosophila
Source: Oxford University Press journal article supplement (doi:10.1534/genetics.113.154914), 2013-09-12
Supplement: genetics.113.154914-5.pdf [file genetics.113.154914-5.pdf]

**Table S4. Mitochondrial-nuclear interaction effects on third-instar larval mass do not depend on development temperature**

| Phenotype                                 | Factor          | numDF | denDf | F-value | P-value |
|-------------------------------------------|-----------------|-------|-------|---------|---------|
| 16°C Larval mass <sup>1</sup><br>(N=161)  | mtDNA           | 1     | 157   | 20.88   | <0.0001 |
|                                           | Nuclear         | 1     | 157   | 30.40   | <0.0001 |
|                                           | mtDNA x Nuclear | 1     | 157   | 8.84    | 0.0034  |
| 25°C Larval mass <sup>1</sup><br>(N= 161) | mtDNA           | 1     | 157   | 10.39   | 0.0015  |
|                                           | Nuclear         | 1     | 157   | 22.12   | <0.0001 |
|                                           | mtDNA x Nuclear | 1     | 157   | 11.93   | 0.0007  |

<sup>1</sup> The dependent variable is  $\ln(\text{mass})$ .
