# Supplementary material for: Pleiotropic Effects of a Mitochondrial–Nuclear Incompatibility Depend upon the Accelerating Effect of Temperature inDrosophila
Source: Oxford University Press journal article supplement (doi:10.1534/genetics.113.154914), 2013-09-12
Supplement: genetics.113.154914-7.pdf [file genetics.113.154914-7.pdf]

**Table S2. Temperature dependence of the mitochondrial-nuclear interaction effect on larval, but not pupal, survival**

| Phenotype                                                           | Factor          | Df | Res Df | <i>F</i> -value <sup>1</sup> | <i>P</i> -value |
|---------------------------------------------------------------------|-----------------|----|--------|------------------------------|-----------------|
| 16°C Egg-to-pupae survival<br>( <i>N</i> = 83 vials) <sup>2</sup>   | mtDNA           | 1  | 81     | 15.30                        | 0.0002          |
|                                                                     | Nuclear         | 1  | 80     | 53.55                        | <0.0001         |
|                                                                     | mtDNA x Nuclear | 1  | 79     | 2.35                         | 0.13            |
| 22°C Egg-to-pupae survival<br>( <i>N</i> = 60 vials) <sup>2</sup>   | mtDNA           | 1  | 58     | 5.41                         | 0.0236          |
|                                                                     | Nuclear         | 1  | 57     | 10.26                        | 0.0022          |
|                                                                     | mtDNA x Nuclear | 1  | 56     | 8.65                         | 0.0048          |
| 25°C Egg-to-pupae survival<br>( <i>N</i> = 81 vials) <sup>2</sup>   | mtDNA           | 1  | 79     | 33.86                        | <0.0001         |
|                                                                     | Nuclear         | 1  | 78     | 136.30                       | <0.0001         |
|                                                                     | mtDNA x Nuclear | 1  | 77     | 6.10                         | 0.0158          |
| 16°C Pupae-to-adult survival<br>( <i>N</i> = 58 vials) <sup>3</sup> | mtDNA           | 1  | 56     | 0.03                         | 0.8724          |
|                                                                     | Nuclear         | 1  | 55     | 4.72                         | 0.0343          |
|                                                                     | mtDNA x Nuclear | 1  | 54     | 1.37                         | 0.2474          |
| 22°C Pupae-to-adult survival<br>( <i>N</i> = 68 vials) <sup>3</sup> | mtDNA           | 1  | 66     | 6.14                         | 0.0159          |
|                                                                     | Nuclear         | 1  | 65     | 2.20                         | 0.1432          |
|                                                                     | mtDNA x Nuclear | 1  | 64     | 0.01                         | 0.9031          |
| 25°C Pupae-to-adult survival<br>( <i>N</i> = 53 vials) <sup>3</sup> | mtDNA           | 1  | 51     | 0.04                         | 0.8362          |
|                                                                     | Nuclear         | 1  | 50     | 0.81                         | 0.3738          |
|                                                                     | mtDNA x Nuclear | 1  | 49     | 0.38                         | 0.5379          |

<sup>1</sup> General linear models fit using quasibinomial distribution of errors

<sup>2</sup> Does not include vials for which pupae count exceeded 50 (# of eggs placed in vial)

<sup>3</sup> Does not include vials for which eclosed count exceeded pupae count
