# Supplementary material for: Pleiotropic Effects of a Mitochondrial–Nuclear Incompatibility Depend upon the Accelerating Effect of Temperature inDrosophila
Source: Oxford University Press journal article supplement (doi:10.1534/genetics.113.154914), 2013-09-12
Supplement: genetics.113.154914-9.pdf [file genetics.113.154914-9.pdf]

**Table S7. Temperature dependence of the mitochondrial-nuclear interaction effect on the  $Q_{10}$  of metabolic rate**

| Development temperature ( $T_{DEV}$ ) | Genotype                         | $Q_{10}$ (CI) <sup>1</sup> |
|---------------------------------------|----------------------------------|----------------------------|
| 16°C                                  | <i>(ore);OreR</i>                | 1.547 (1.439, 1.687)       |
|                                       | <i>(simw<sup>501</sup>);OreR</i> | 1.316 (1.154, 1.556)       |
|                                       | <i>(ore);Aut</i>                 | 1.860 (1.797, 1.935)       |
|                                       | <i>(simw<sup>501</sup>);Aut</i>  | 1.823 (1.689, 1.999)       |
| 25°C                                  | <i>(ore);OreR</i>                | 1.809 (1.670, 1.990)       |
|                                       | <i>(simw<sup>501</sup>);OreR</i> | 1.847 (1.801, 1.903)       |
|                                       | <i>(ore);Aut</i>                 | 2.649 (2.571, 2.740)       |
|                                       | <i>(simw<sup>501</sup>);Aut</i>  | 2.283 (2.228, 2.351)       |

<sup>1</sup>  $Q_{10}$  for metabolic rate, estimated from the genotype mean mass-corrected routine metabolic rates (RMR) measured at 16 and 26°C, as  $Q_{10} = (RMR_{25°C}/RMR_{16°C})^{10/(25-16)}$ . Confidence intervals were calculated using the upper and lower 95% CIs of the genotype mean RMRs at each temperature.
