# Supplementary material for: Pleiotropic Effects of a Mitochondrial–Nuclear Incompatibility Depend upon the Accelerating Effect of Temperature inDrosophila
Source: Oxford University Press journal article supplement (doi:10.1534/genetics.113.154914), 2013-09-12
Supplement: genetics.113.154914-10.pdf [file genetics.113.154914-10.pdf]

**Table S1. Temperature dependence of the mitochondrial-nuclear interaction effect on egg-to-adult development time**

| Phenotype                                    | Factor <sup>1</sup> | numDF | denDf | F-value | P-value |
|----------------------------------------------|---------------------|-------|-------|---------|---------|
| 16°C Development time<br>(N=2300, 84 vials)  | mtDNA               | 1     | 80    | 51.57   | <0.0001 |
|                                              | Nuclear             | 1     | 80    | 5.91    | 0.0173  |
|                                              | mtDNA x Nuclear     | 1     | 80    | 0.38    | 0.5413  |
| 22°C Development time<br>(N= 3105, 80 vials) | mtDNA               | 1     | 76    | 263.60  | <0.0001 |
|                                              | Nuclear             | 1     | 76    | 213.20  | <0.0001 |
|                                              | mtDNA x Nuclear     | 1     | 76    | 104.00  | <0.0001 |
| 25°C Development time<br>(N= 3209, 86 vials) | mtDNA               | 1     | 82    | 1034.12 | <0.0001 |
|                                              | Nuclear             | 1     | 82    | 440.07  | <0.0001 |
|                                              | mtDNA x Nuclear     | 1     | 82    | 274.60  | <0.0001 |
| 28°C Development time<br>(N= 1873, 75 vials) | mtDNA               | 1     | 71    | 18.40   | 0.0001  |
|                                              | Nuclear             | 1     | 71    | 30.00   | <0.0001 |
|                                              | mtDNA x Nuclear     | 1     | 71    | 2780.20 | <0.0001 |

<sup>1</sup> Mixed-model ANOVA fit using restricted maximum likelihood and including vial as a random factor

**Table S2. Temperature dependence of the mitochondrial-nuclear interaction effect on larval, but not pupal, survival**

| Phenotype                                                           | Factor          | Df | Res Df | <i>F</i> -value <sup>1</sup> | <i>P</i> -value |
|---------------------------------------------------------------------|-----------------|----|--------|------------------------------|-----------------|
| 16°C Egg-to-pupae survival<br>( <i>N</i> = 83 vials) <sup>2</sup>   | mtDNA           | 1  | 81     | 15.30                        | 0.0002          |
|                                                                     | Nuclear         | 1  | 80     | 53.55                        | <0.0001         |
|                                                                     | mtDNA x Nuclear | 1  | 79     | 2.35                         | 0.13            |
| 22°C Egg-to-pupae survival<br>( <i>N</i> = 60 vials) <sup>2</sup>   | mtDNA           | 1  | 58     | 5.41                         | 0.0236          |
|                                                                     | Nuclear         | 1  | 57     | 10.26                        | 0.0022          |
|                                                                     | mtDNA x Nuclear | 1  | 56     | 8.65                         | 0.0048          |
| 25°C Egg-to-pupae survival<br>( <i>N</i> = 81 vials) <sup>2</sup>   | mtDNA           | 1  | 79     | 33.86                        | <0.0001         |
|                                                                     | Nuclear         | 1  | 78     | 136.30                       | <0.0001         |
|                                                                     | mtDNA x Nuclear | 1  | 77     | 6.10                         | 0.0158          |
| 16°C Pupae-to-adult survival<br>( <i>N</i> = 58 vials) <sup>3</sup> | mtDNA           | 1  | 56     | 0.03                         | 0.8724          |
|                                                                     | Nuclear         | 1  | 55     | 4.72                         | 0.0343          |
|                                                                     | mtDNA x Nuclear | 1  | 54     | 1.37                         | 0.2474          |
| 22°C Pupae-to-adult survival<br>( <i>N</i> = 68 vials) <sup>3</sup> | mtDNA           | 1  | 66     | 6.14                         | 0.0159          |
|                                                                     | Nuclear         | 1  | 65     | 2.20                         | 0.1432          |
|                                                                     | mtDNA x Nuclear | 1  | 64     | 0.01                         | 0.9031          |
| 25°C Pupae-to-adult survival<br>( <i>N</i> = 53 vials) <sup>3</sup> | mtDNA           | 1  | 51     | 0.04                         | 0.8362          |
|                                                                     | Nuclear         | 1  | 50     | 0.81                         | 0.3738          |
|                                                                     | mtDNA x Nuclear | 1  | 49     | 0.38                         | 0.5379          |

<sup>1</sup> General linear models fit using quasibinomial distribution of errors

<sup>2</sup> Does not include vials for which pupae count exceeded 50 (# of eggs placed in vial)

<sup>3</sup> Does not include vials for which eclosed count exceeded pupae count

**Table S3. Temperature dependence of the mitochondrial-nuclear interaction effect on pupation height**

| Phenotype                                   | Factor <sup>1</sup> | numDF | denDf | F-value | P-value |
|---------------------------------------------|---------------------|-------|-------|---------|---------|
| 16°C Pupation height<br>(N=1271, 40 vials)  | mtDNA               | 1     | 36    | 0.28    | 0.5991  |
|                                             | Nuclear             | 1     | 36    | 23.78   | <0.0001 |
|                                             | mtDNA x Nuclear     | 1     | 36    | 3.57    | 0.0668  |
| 22°C Pupation height<br>(N= 1745, 40 vials) | mtDNA               | 1     | 36    | 13.56   | 0.0008  |
|                                             | Nuclear             | 1     | 36    | 6.21    | 0.0175  |
|                                             | mtDNA x Nuclear     | 1     | 36    | 8.39    | 0.0064  |
| 25°C Pupation height<br>(N= 1588, 40 vials) | mtDNA               | 1     | 36    | 13.46   | 0.0008  |
|                                             | Nuclear             | 1     | 36    | 56.60   | <0.0001 |
|                                             | mtDNA x Nuclear     | 1     | 36    | 19.14   | 0.0001  |

<sup>1</sup> Mixed-model ANOVA fit using restricted maximum likelihood and including vial as a random factor

**Table S4. Mitochondrial-nuclear interaction effects on third-instar larval mass do not depend on development temperature**

| Phenotype                                 | Factor          | numDF | denDf | F-value | P-value |
|-------------------------------------------|-----------------|-------|-------|---------|---------|
| 16°C Larval mass <sup>1</sup><br>(N=161)  | mtDNA           | 1     | 157   | 20.88   | <0.0001 |
|                                           | Nuclear         | 1     | 157   | 30.40   | <0.0001 |
|                                           | mtDNA x Nuclear | 1     | 157   | 8.84    | 0.0034  |
| 25°C Larval mass <sup>1</sup><br>(N= 161) | mtDNA           | 1     | 157   | 10.39   | 0.0015  |
|                                           | Nuclear         | 1     | 157   | 22.12   | <0.0001 |
|                                           | mtDNA x Nuclear | 1     | 157   | 11.93   | 0.0007  |

<sup>1</sup> The dependent variable is  $\ln(\text{mass})$ .

**Table S5. Temperature dependence of the mitochondrial-nuclear interaction effect on metabolic rate**

| Phenotype <sup>1</sup> | Genotype                         | Common slope (CI) <sup>2</sup> | Common slope<br>y-axis intercept (CI) <sup>3</sup> | Shift along<br>common<br>slope? |
|------------------------|----------------------------------|--------------------------------|----------------------------------------------------|---------------------------------|
| 16°C Metabolic Rate    |                                  | 1.267 (1.068,1.508)            |                                                    |                                 |
|                        | <i>(ore);OreR</i>                |                                | <b>0.2245<sup>a</sup></b> (0.0391, 0.4099)         | no                              |
|                        | <i>(simw<sup>501</sup>);OreR</i> |                                | <b>0.2452<sup>a</sup></b> (0.0748, 0.4156)         | Yes <sup>4</sup>                |
|                        | <i>(ore);Aut</i>                 |                                | 0.1403 <sup>b</sup> (-0.0357, 0.3163)              | no                              |
|                        | <i>(simw<sup>501</sup>);Aut</i>  |                                | 0.1614 <sup>b</sup> (-0.0182, 0.3410)              | no                              |
| 25°C Metabolic Rate    |                                  | 0.7350<br>(0.6377,0.8466)      |                                                    |                                 |
|                        | <i>(ore);OreR</i>                |                                | 0.8244 <sup>c</sup> (0.7294, 0.9194)               | no                              |
|                        | <i>(simw<sup>501</sup>);OreR</i> |                                | <b>0.8937<sup>d</sup></b> (0.8176, 0.9700)         | Yes <sup>4</sup>                |
|                        | <i>(ore);Aut</i>                 |                                | 0.8263 <sup>c</sup> (0.7356, 0.9170)               | no                              |
|                        | <i>(simw<sup>501</sup>);Aut</i>  |                                | 0.8042 <sup>c</sup> (0.7079, 0.9005)               | no                              |

<sup>1</sup> Metabolic rate of larvae developed at 16°C and measured at 16°C or developed at 25°C and measured at 25°C.

<sup>2</sup> Common slope from a Type II model regression analysis of ln(metabolic rate) on ln(larval mass).

<sup>3</sup> Different letters denote significant differences in the y-intercept (metabolic rate) within a common slope ( $P < 0.05$ ).

<sup>4</sup> The significant shift in the x-axis (mass) along the common slope reflects a downward shift in the distribution of masses for *(simw<sup>501</sup>);OreR* larvae ( $P < 0.05$ ).

**Table S6. Temperature dependence of the mitochondrial-nuclear interaction effect on metabolic plasticity**

| Phenotype                                                 | Factor                                            | numDF | denDf | F-value | P-value |
|-----------------------------------------------------------|---------------------------------------------------|-------|-------|---------|---------|
| Mass-corrected larval<br>metabolic rate<br>(N=322)        | T <sub>DEV</sub>                                  | 1     | 306   | 9.219   | 0.0026  |
|                                                           | T <sub>MEASURE</sub>                              | 1     | 306   | 651.8   | <0.0001 |
|                                                           | mtDNA                                             | 1     | 306   | 0.557   | 0.4560  |
|                                                           | Nuclear                                           | 1     | 306   | 17.19   | <0.0001 |
|                                                           | T <sub>DEV</sub> × T <sub>MEASURE</sub>           | 1     | 306   | 40.44   | <0.0001 |
|                                                           | T <sub>DEV</sub> × mtDNA                          | 1     | 306   | 8.945   | 0.0030  |
|                                                           | T <sub>MEASURE</sub> × mtDNA                      | 1     | 306   | 2.755   | 0.0980  |
|                                                           | T <sub>DEV</sub> × Nuclear                        | 1     | 306   | 12.93   | 0.0004  |
|                                                           | T <sub>MEASURE</sub> × Nuclear                    | 1     | 306   | 16.90   | 0.0001  |
|                                                           | mtDNA × Nuclear                                   | 1     | 306   | 2.277   | 0.1323  |
|                                                           | T <sub>DEV</sub> × T <sub>MEASURE</sub> × mtDNA   | 1     | 306   | 0.917   | 0.3390  |
|                                                           | T <sub>DEV</sub> × T <sub>MEASURE</sub> × Nuclear | 1     | 306   | 0.692   | 0.4061  |
|                                                           | T <sub>DEV</sub> × mtDNA × Nuclear                | 1     | 306   | 13.074  | 0.0004  |
|                                                           | T <sub>MEASURE</sub> × mtDNA × Nuclear            | 1     | 306   | 0.018   | 0.8920  |
| T <sub>DEV</sub> × T <sub>MEASURE</sub> × mtDNA × Nuclear | 1                                                 | 306   | 4.939 | 0.0270  |         |

**Table S7. Temperature dependence of the mitochondrial-nuclear interaction effect on the  $Q_{10}$  of metabolic rate**

| Development temperature ( $T_{DEV}$ ) | Genotype                         | $Q_{10}$ (CI) <sup>1</sup> |
|---------------------------------------|----------------------------------|----------------------------|
| 16°C                                  | <i>(ore);OreR</i>                | 1.547 (1.439, 1.687)       |
|                                       | <i>(simw<sup>501</sup>);OreR</i> | 1.316 (1.154, 1.556)       |
|                                       | <i>(ore);Aut</i>                 | 1.860 (1.797, 1.935)       |
|                                       | <i>(simw<sup>501</sup>);Aut</i>  | 1.823 (1.689, 1.999)       |
| 25°C                                  | <i>(ore);OreR</i>                | 1.809 (1.670, 1.990)       |
|                                       | <i>(simw<sup>501</sup>);OreR</i> | 1.847 (1.801, 1.903)       |
|                                       | <i>(ore);Aut</i>                 | 2.649 (2.571, 2.740)       |
|                                       | <i>(simw<sup>501</sup>);Aut</i>  | 2.283 (2.228, 2.351)       |

<sup>1</sup>  $Q_{10}$  for metabolic rate, estimated from the genotype mean mass-corrected routine metabolic rates (RMR) measured at 16 and 26°C, as  $Q_{10} = (RMR_{25°C}/RMR_{16°C})^{10/(25-16)}$ . Confidence intervals were calculated using the upper and lower 95% CIs of the genotype mean RMRs at each temperature.

## Files S1-S5

Available for download at <http://www.genetics.org/lookup/suppl/doi:10.1534/genetics.113.154914/-/DC1>

**File S1** Egg to adult development time in days. Each row is an individual fly.

**File S2** Each row is a vial. Pupated is number pupae from 50 eggs placed in vial. Vials where the number of pupae exceeded 50 were removed.

**File S3** Each row is a vial. Eclosed is number of flies eclosed from those pupated. Vials where the number of flies eclosed exceeded the number of pupae were removed.

**File S4** Each row is a pupal height as described in the manuscript.

**File S5** Each row is data from a sample of 5 larvae. Mass = weight of 5 larvae in mg. T1 = temperature of air as it passes through the CO<sub>2</sub> detector. T2 = temperature of air in the measurement chambers where larvae are respiring. CO<sub>2</sub> = VCO<sub>2</sub> measure as described in the manuscript. CO<sub>2</sub>.MC = Mass corrected VCO<sub>2</sub> measure as described in the manuscript.
