# Supplementary material for: Pleiotropic Effects of a Mitochondrial–Nuclear Incompatibility Depend upon the Accelerating Effect of Temperature inDrosophila
Source: Oxford University Press journal article supplement (doi:10.1534/genetics.113.154914), 2013-09-12
Supplement: genetics.113.154914-11.pdf [file genetics.113.154914-11.pdf]

**Table S5. Temperature dependence of the mitochondrial-nuclear interaction effect on metabolic rate**

| Phenotype <sup>1</sup> | Genotype                         | Common slope (CI) <sup>2</sup> | Common slope<br>y-axis intercept (CI) <sup>3</sup> | Shift along<br>common<br>slope? |
|------------------------|----------------------------------|--------------------------------|----------------------------------------------------|---------------------------------|
| 16°C Metabolic Rate    |                                  | 1.267 (1.068,1.508)            |                                                    |                                 |
|                        | <i>(ore);OreR</i>                |                                | <b>0.2245<sup>a</sup></b> (0.0391, 0.4099)         | no                              |
|                        | <i>(simw<sup>501</sup>);OreR</i> |                                | <b>0.2452<sup>a</sup></b> (0.0748, 0.4156)         | Yes <sup>4</sup>                |
|                        | <i>(ore);Aut</i>                 |                                | 0.1403 <sup>b</sup> (-0.0357, 0.3163)              | no                              |
|                        | <i>(simw<sup>501</sup>);Aut</i>  |                                | 0.1614 <sup>b</sup> (-0.0182, 0.3410)              | no                              |
| 25°C Metabolic Rate    |                                  | 0.7350<br>(0.6377,0.8466)      |                                                    |                                 |
|                        | <i>(ore);OreR</i>                |                                | 0.8244 <sup>c</sup> (0.7294, 0.9194)               | no                              |
|                        | <i>(simw<sup>501</sup>);OreR</i> |                                | <b>0.8937<sup>d</sup></b> (0.8176, 0.9700)         | Yes <sup>4</sup>                |
|                        | <i>(ore);Aut</i>                 |                                | 0.8263 <sup>c</sup> (0.7356, 0.9170)               | no                              |
|                        | <i>(simw<sup>501</sup>);Aut</i>  |                                | 0.8042 <sup>c</sup> (0.7079, 0.9005)               | no                              |

<sup>1</sup> Metabolic rate of larvae developed at 16°C and measured at 16°C or developed at 25°C and measured at 25°C.

<sup>2</sup> Common slope from a Type II model regression analysis of ln(metabolic rate) on ln(larval mass).

<sup>3</sup> Different letters denote significant differences in the y-intercept (metabolic rate) within a common slope ( $P < 0.05$ ).

<sup>4</sup> The significant shift in the x-axis (mass) along the common slope reflects a downward shift in the distribution of masses for *(simw<sup>501</sup>);OreR* larvae ( $P < 0.05$ ).
