# Supplementary material for: Pleiotropic Effects of a Mitochondrial–Nuclear Incompatibility Depend upon the Accelerating Effect of Temperature inDrosophila
Source: Oxford University Press journal article supplement (doi:10.1534/genetics.113.154914), 2013-09-12
Supplement: genetics.113.154914-13.pdf [file genetics.113.154914-13.pdf]

**Table S1. Temperature dependence of the mitochondrial-nuclear interaction effect on egg-to-adult development time**

| Phenotype                                    | Factor <sup>1</sup> | numDF | denDf | F-value | P-value |
|----------------------------------------------|---------------------|-------|-------|---------|---------|
| 16°C Development time<br>(N=2300, 84 vials)  | mtDNA               | 1     | 80    | 51.57   | <0.0001 |
|                                              | Nuclear             | 1     | 80    | 5.91    | 0.0173  |
|                                              | mtDNA x Nuclear     | 1     | 80    | 0.38    | 0.5413  |
| 22°C Development time<br>(N= 3105, 80 vials) | mtDNA               | 1     | 76    | 263.60  | <0.0001 |
|                                              | Nuclear             | 1     | 76    | 213.20  | <0.0001 |
|                                              | mtDNA x Nuclear     | 1     | 76    | 104.00  | <0.0001 |
| 25°C Development time<br>(N= 3209, 86 vials) | mtDNA               | 1     | 82    | 1034.12 | <0.0001 |
|                                              | Nuclear             | 1     | 82    | 440.07  | <0.0001 |
|                                              | mtDNA x Nuclear     | 1     | 82    | 274.60  | <0.0001 |
| 28°C Development time<br>(N= 1873, 75 vials) | mtDNA               | 1     | 71    | 18.40   | 0.0001  |
|                                              | Nuclear             | 1     | 71    | 30.00   | <0.0001 |
|                                              | mtDNA x Nuclear     | 1     | 71    | 2780.20 | <0.0001 |

<sup>1</sup> Mixed-model ANOVA fit using restricted maximum likelihood and including vial as a random factor
